# Supplementary material for: All-Polymer Solar Cells Sequentially Solution Processed from Hydrocarbon Solvent with a Thick Active Layer
Source: MDPI journal article supplement (doi:10.3390/polym15163462), 2023-08-18
Supplement: s1 [file s1]

## Supporting information

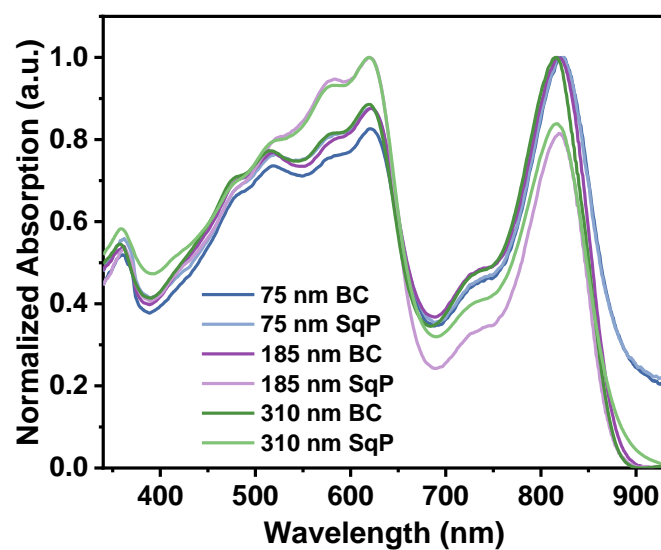

Figure S1. UV-Vis absorption of the blend films.

**Table S1.** The  $J_{sc}$  measured from J-V test and the values of EQE-integrated current density for PM6/PYF-T-*o* based all-PCs processed from different methods, measured under AM 1.5 G illumination at  $100 \text{ mW cm}^{-2}$ .

| Thickness<br>[nm] | Active Layer | $J_{sc}$<br>[mA cm <sup>-2</sup> ] | EQE Integrated<br>Current Density<br>[mA cm <sup>-2</sup> ] |
|-------------------|--------------|------------------------------------|-------------------------------------------------------------|
| 75                | BC           | 24.6±0.3<br>(24.6)                 | 23.8                                                        |
|                   | SqP          | 25.4±0.5<br>(25.3)                 | 24.3                                                        |
| 185               | BC           | 24.1±0.4<br>(24.2)                 | 21.4                                                        |
|                   | SqP          | 24.2±0.6<br>(25.0)                 | 21.7                                                        |
| 310               | BC           | 25.8±0.4<br>(26.5)                 | 24.2                                                        |
|                   | SqP          | 25.1±0.6<br>(26.3)                 | 24.9                                                        |

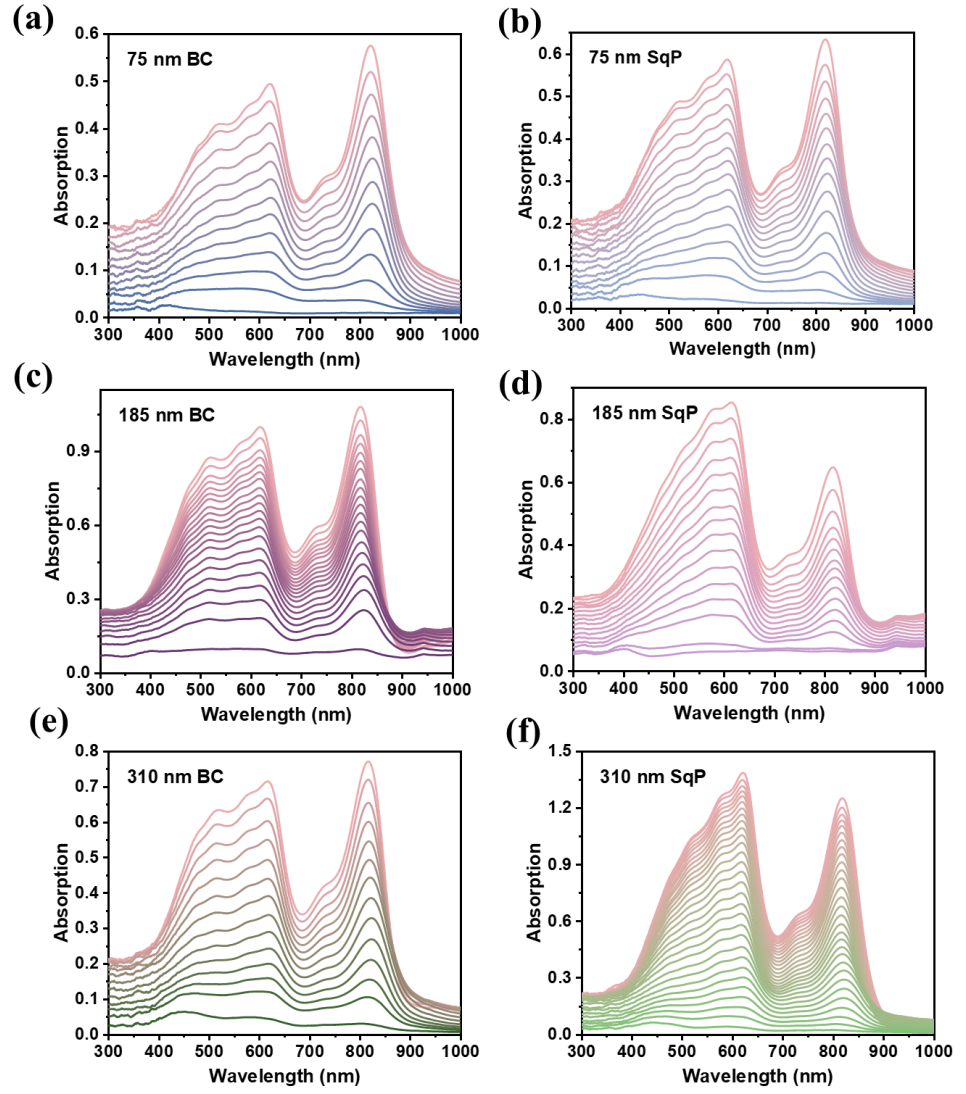

**Figure S2.** (a–f) Film-depth-dependent light absorption spectra (FLAS) of the active layer for BC and SqP blend films at each thickness.

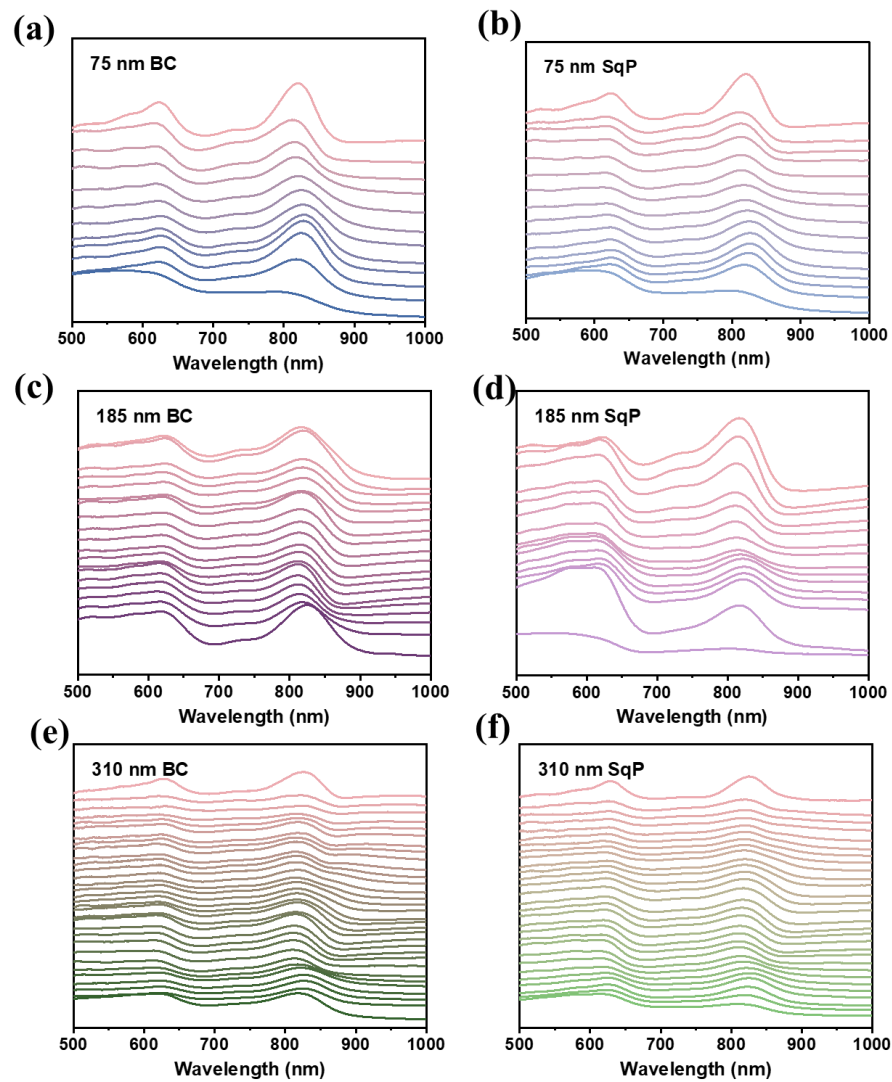

**Figure S3.** (a-f) Absorption of the sub-layer calculated from FLAS spectra.

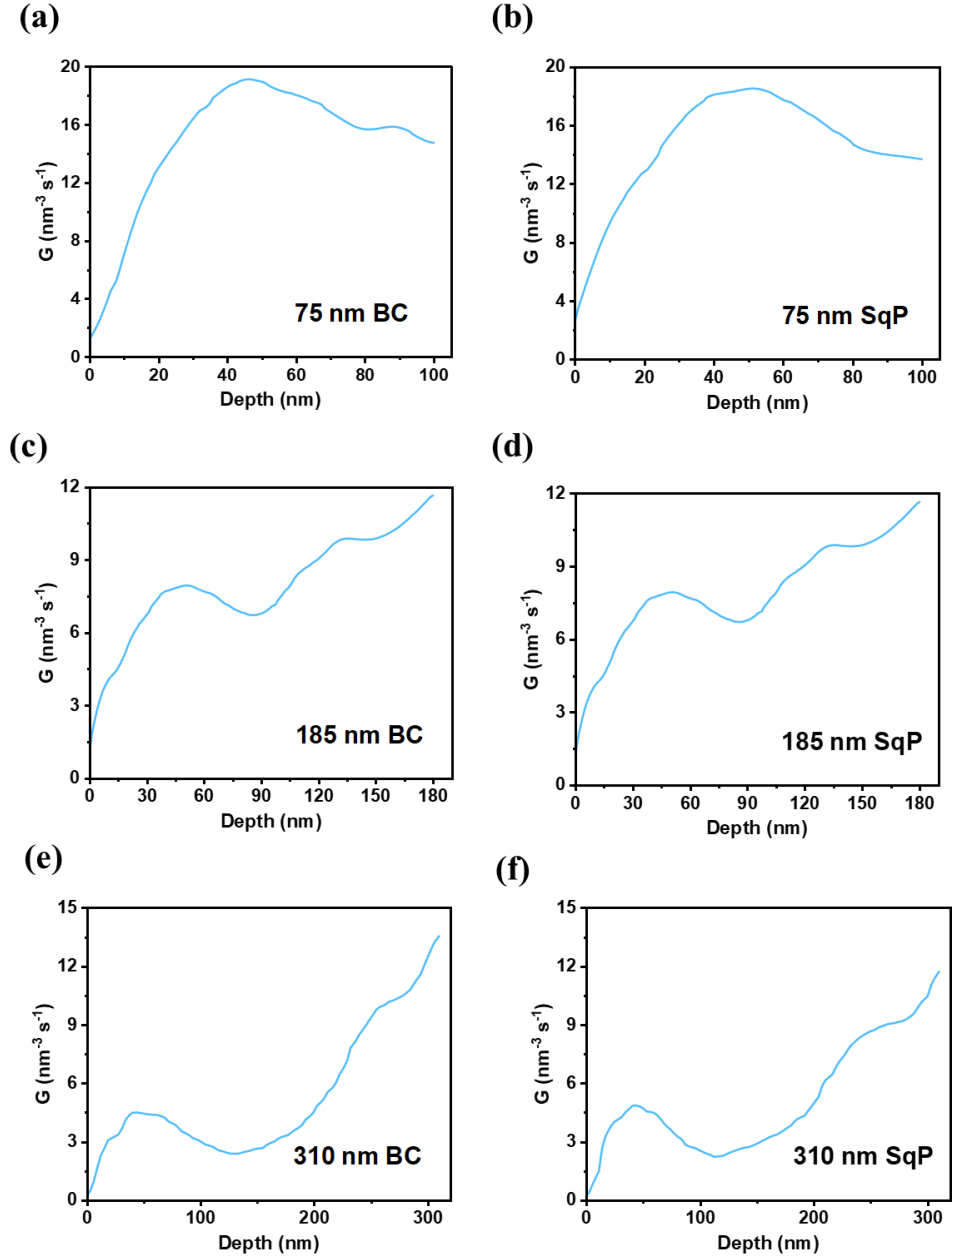

**Figure S4.** (a–f) Exciton generation map across the vertical direction of the active layer film as a function of wavelength.

**Table S2.** BC device performance with active layers under different processing parameters, measured under AM 1.5 G illumination at  $100 \text{ mW cm}^{-2}$ .

| Devices                                 | Speed [rpm] | Voc [V] | Jsc [mA/cm <sup>2</sup> ] | FF    | PCE [%] |
|-----------------------------------------|-------------|---------|---------------------------|-------|---------|
| PM6: PYF-T- <i>o</i> (6 mg/mL + 1% CN)  | 4000        | 0.914   | 24.5                      | 0.690 | 15.4    |
|                                         | 3000        | 0.914   | 24.8                      | 0.684 | 15.5    |
|                                         | 2000        | 0.901   | 25.0                      | 0.603 | 13.6    |
| PM6: PYF-T- <i>o</i> (7 mg/mL + 1% CN)  | 4500        | 0.906   | 24.5                      | 0.588 | 13.0    |
|                                         | 3500        | 0.904   | 23.9                      | 0.555 | 11.9    |
| PM6: PYF-T- <i>o</i> (8 mg/mL + 2% CN)  | 4000        | 0.907   | 24.2                      | 0.550 | 12.1    |
| PM6: PYF-T- <i>o</i> (10 mg/mL + 1% CN) | 4000        | 0.895   | 21.8                      | 0.441 | 8.6     |
|                                         | 3000        | 0.896   | 21.9                      | 0.401 | 7.9     |
|                                         | 2000        | 0.890   | 20.9                      | 0.394 | 7.2     |

|                                         |      |       |      |       |      |
|-----------------------------------------|------|-------|------|-------|------|
| PM6: PYF-T- <i>o</i> (10 mg/mL + 2% CN) | 4000 | 0.895 | 25.9 | 0.526 | 12.2 |
|                                         | 3000 | 0.892 | 24.6 | 0.478 | 10.5 |

**Table S3.** SqP device performance with active layers under different processing parameters, measured under AM 1.5 G illumination at 100 mW cm<sup>-2</sup>.

| Devices                                                     | Speed [rpm] | Voc [V] | Jsc [mA/cm <sup>2</sup> ] | FF    | PCE [%] |
|-------------------------------------------------------------|-------------|---------|---------------------------|-------|---------|
| PM6 (8 mg/mL)<br>PYF-T- <i>o</i> (12 mg/mL + 2%CN)          | 4000        | 0.922   | 24.5                      | 0.707 | 15.7    |
|                                                             | 3000        | 0.912   | 25.9                      | 0.680 | 16.1    |
|                                                             | 2000        | 0.913   | 24.3                      | 0.637 | 14.0    |
| PM6 (12 mg/mL)<br>PYF-T- <i>o</i> (16 mg/mL + 2%CN)         | 4000        | 0.917   | 23.6                      | 0.606 | 13.1    |
|                                                             | 3000        | 0.913   | 22.1                      | 0.564 | 11.4    |
|                                                             | 2000        | 0.904   | 18.1                      | 0.554 | 9.1     |
| PM6 (12 mg/mL + 2%CN)<br>PYF-T- <i>o</i> (16 mg/mL + 4%CN)  | 4000        | 0.914   | 23.8                      | 0.636 | 13.8    |
| PM6 (16 mg/ml)<br>PYF-T- <i>o</i> (20 mg/ml+6%CN)           | 4000        | 0.901   | 22.8                      | 0.537 | 11.0    |
|                                                             | 3000        | 0.896   | 18.5                      | 0.503 | 8.3     |
|                                                             | 2000        | 0.889   | 16.7                      | 0.484 | 7.2     |
| PM6 (16 mg/mL: + 6%CN)<br>PYF-T- <i>o</i> (20 mg/mL + 6%CN) | 4000        | 0.901   | 25.1                      | 0.604 | 13.6    |
